# Supplementary material for: Loss of immunity-related GTPase GM4951 leads to nonalcoholic fatty liver disease without obesity
Source: PubMed Central journal article supplement (PMC9288484; doi:10.1038/s41467-022-31812-4), 2022-07-16
Supplement: 41467_2022_31812_MOESM1_ESM.pdf [file 41467_2022_31812_MOESM1_ESM.pdf]

## Supplementary Information

### **Loss of immunity-related GTPase GM4951 leads to nonalcoholic fatty liver disease without obesity**

Zhao Zhang<sup>1,2,\*</sup>, Yu Xun<sup>1,2</sup>, Shunxing Rong<sup>3,4</sup>, Lijuan Yan<sup>1</sup>, Jeffrey A. SoRelle<sup>1</sup>, Xiaohong Li<sup>1</sup>, Miao Tang<sup>1</sup>, Katie Keller<sup>1</sup>, Sara Ludwig<sup>1</sup>, Eva Marie Y. Moresco<sup>1</sup>, Bruce Beutler<sup>1,\*</sup>

<sup>1</sup>Center for the Genetics of Host Defense, University of Texas Southwestern Medical Center, Dallas, TX, 75390, USA.

<sup>2</sup>Division of Endocrinology, Department of Internal Medicine, University of Texas Southwestern Medical Center, Dallas, TX, 75390, USA.

<sup>3</sup>Center for Human Nutrition, University of Texas Southwestern Medical Center, Dallas, TX, 75390, USA.

<sup>4</sup>Department of Molecular Genetics, University of Texas Southwestern Medical Center, Dallas, TX, 75390, USA.

\*Correspondence: [Zhao.Zhang@UTSouthwestern.edu](mailto:Zhao.Zhang@UTSouthwestern.edu); [Bruce.Beutler@UTSouthwestern.edu](mailto:Bruce.Beutler@UTSouthwestern.edu)

#### **This PDF file includes:**

Supplementary Figures 1-8

Supplementary Table 1

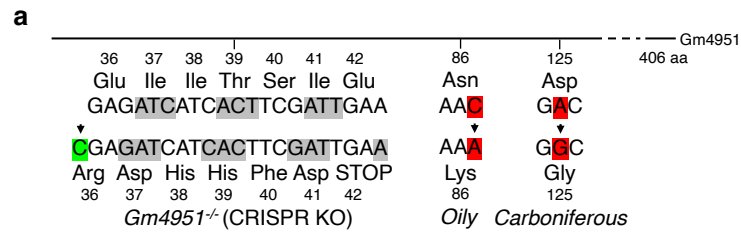

**b**

Birth ratio of *Gm4951*<sup>+/-</sup> breedings

| Genotype                     | Pup numbers | Percentage |
|------------------------------|-------------|------------|
| +/+                          | 47          | 23.2%      |
| <i>Gm4951</i> <sup>+/-</sup> | 105         | 51.7%      |
| <i>Gm4951</i> <sup>-/-</sup> | 51          | 25.1%      |

**Supplementary Fig. 1 *Gm4951* mutations and birth ratios of knockout mice.** **a** Illustration of nucleotide and amino acid changes in *Oily*, *Carboniferous*, and *Gm4951* knockout mice. Green indicates an insertion; red indicates a substitution. **b** Number of pups with different genotypes generated from *Gm4951*<sup>+/-</sup> breedings.

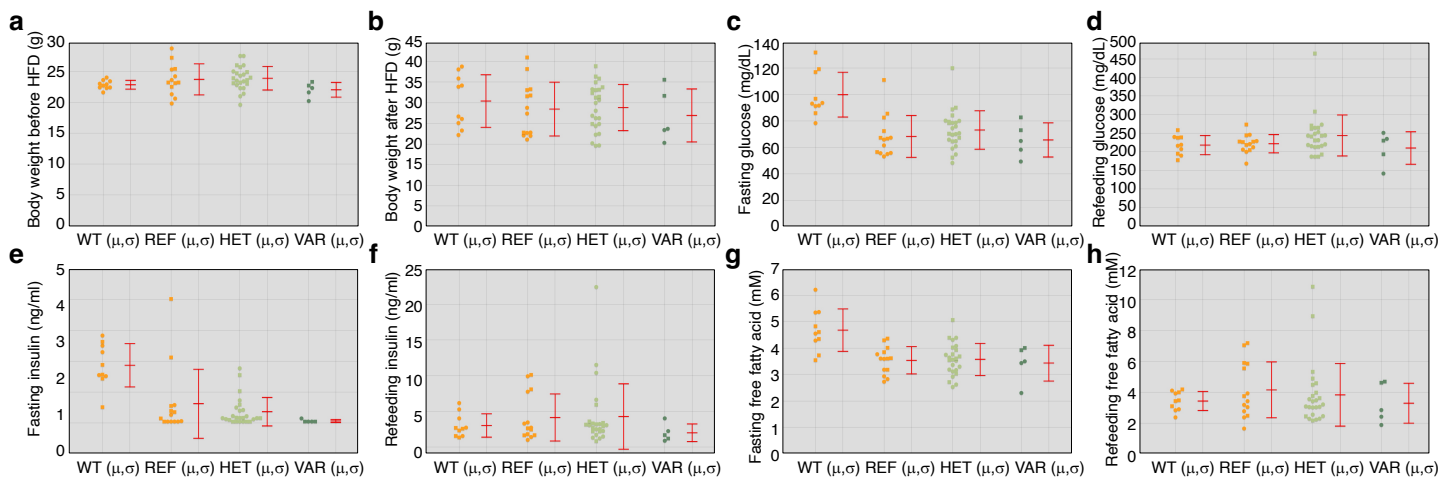

**Supplementary Fig. 2 The *Oily* phenotype.** a-h Body weight before HFD (a), body weight after 4 weeks on a HFD (b), overnight fasting glucose (c), glucose 2 h after refeeding (d), overnight fasting insulin (e), insulin 2 h after refeeding (f), overnight fasting free fatty acid (g), and free fatty acid 2 h after refeeding (h) in G3 mice were plotted vs. genotype at the *Oily* mutation site of *Gm4951* (n=10 mice in WT; n=14 mice in REF; n=25 mice in HET; n=5 mice in VAR). Data in c-h were measured after 2 weeks on a HFD. WT, C57BL/6J mice age-matched with G3 mice; REF, G3 mice homozygous for the reference allele of *Gm4951*; HET, G3 mice heterozygous for the reference allele and for the *Oily* allele; VAR, G3 mice homozygous for the *Oily* allele. Each data point represents one mouse. Mean ( $\mu$ ) and SD ( $\sigma$ ) are indicated. Data are from one experiment.

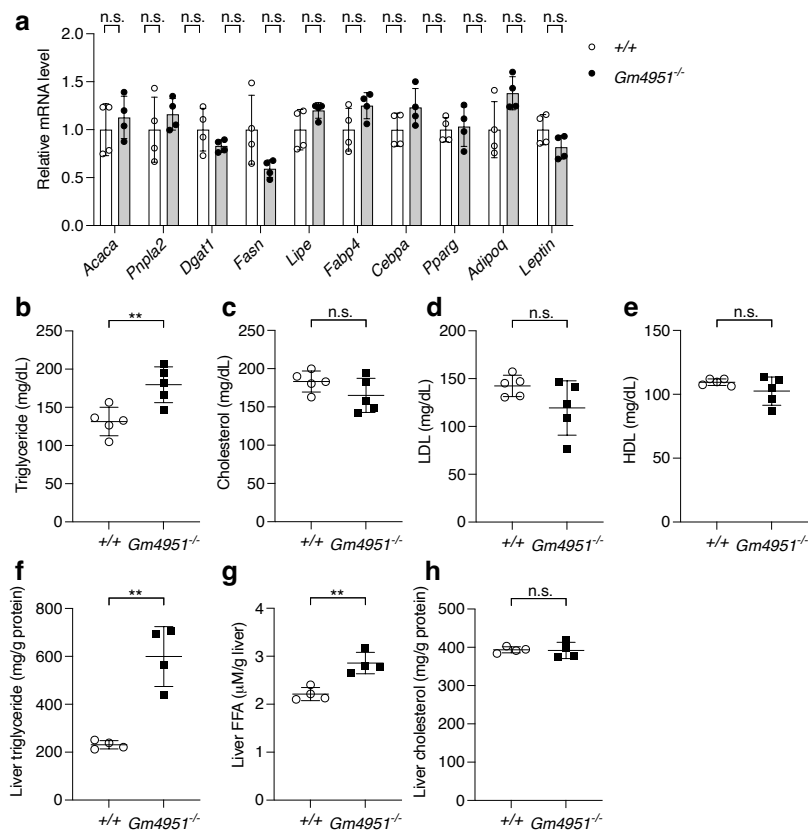

**Supplementary Fig. 3 Lipid metabolism of adipose tissue, liver, and serum in WT and *Gm4951*<sup>-/-</sup> mice.** **a** Relative mRNA level of different genes in the iWAT from WT and *Gm4951*<sup>-/-</sup> mice on HFD for 4 weeks (n=4 mice per genotype). Levels were normalized to *Polr2a* mRNA and then to levels in WT mice. **b-e** Fasting serum triglyceride (**b**), whole cholesterol (**c**), LDL cholesterol (**d**), and HDL cholesterol (**e**) of WT and *Gm4951*<sup>-/-</sup> mice on HFD for 4 weeks (n=5 mice per genotype). **f-h** Liver triglyceride (**f**), FFA (**g**), and cholesterol (**h**) of WT and *Gm4951*<sup>-/-</sup> mice on HFD for 4 weeks (n=4 mice per genotype). Each data point represents one mouse. Data are presented as means ± SD. *P* values were determined by two-tailed Student's *t* test. *P* values are denoted by **\*\*** *P* < 0.01; ns, not significant with *P* > 0.05. The exact *P* values of statistically significant groups are: 0.0069 (**b**), 0.0011 (**f**), 0.0026 (**g**). Data are representative of two independent experiments.

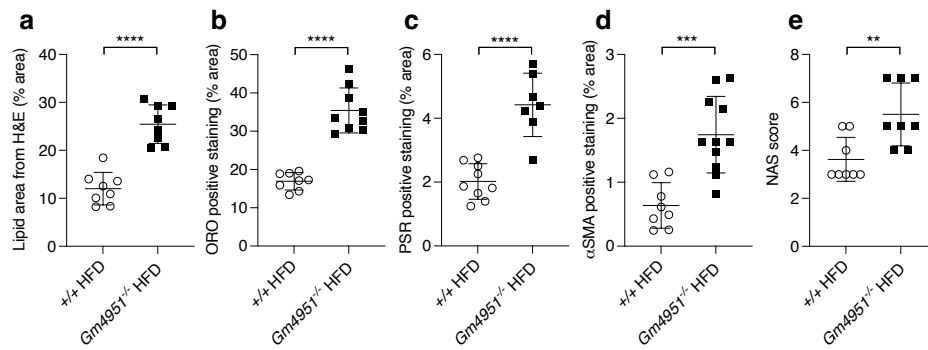

**Supplementary Fig. 4 Quantification of histological stains in liver sections.** **a** Quantification of lipid area in liver sections stained with H&E (n=8 images per genotype). **b-d**, Quantification of stained area in liver sections stained with ORO (n=8 images in +/+; n=9 images in *Gm4951*<sup>-/-</sup>) (**b**), PSR (n=9 images in +/+; n=7 images in *Gm4951*<sup>-/-</sup>) (**c**), and αSMA (n=8 images in +/+; n=11 images in *Gm4951*<sup>-/-</sup>) (**d**). Data in **a-d** are expressed as a percentage of total area per image. **e** NAS score. Data points represent individual images. Data are presented as means ± SD. *P* values were determined by two-tailed Student's *t* test. *P* values are denoted by \*\* *P* < 0.01; \*\*\* *P* < 0.001; \*\*\*\* *P* < 0.0001; ns, not significant with *P* > 0.05. The exact *P* values of statistically significant groups are: 4.29 × 10<sup>-6</sup> (**a**), 5.094 × 10<sup>-7</sup> (**b**), 2.505 × 10<sup>-5</sup> (**c**), 0.0002 (**d**), 0.0051 (**e**). Data are from one experiment.

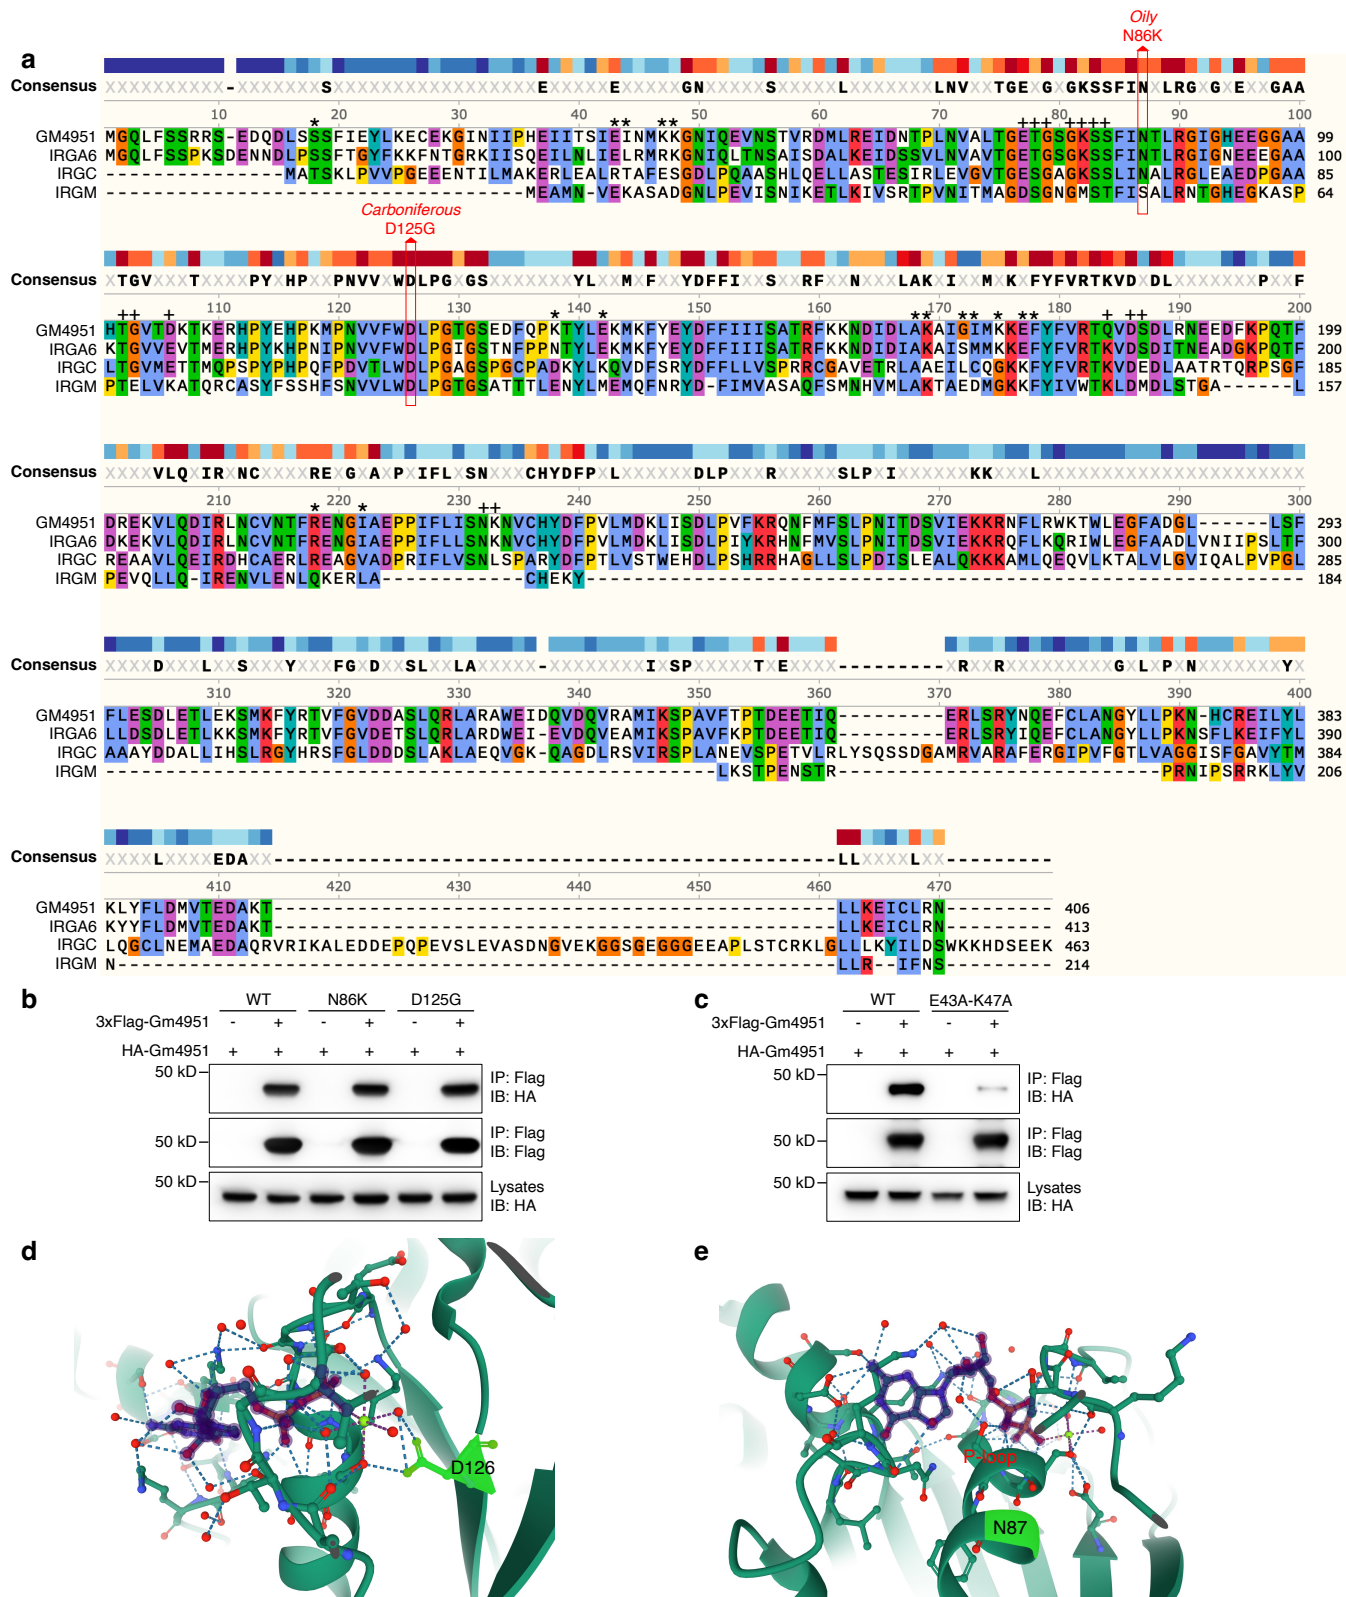

**Supplementary Fig. 5 N86 and D125 are conserved between GM4951 and other IRG proteins. a** Protein sequence alignment between mouse GM4951, mouse IRGA6, human IRGC, and human IRGM. According to IRGA6 structure<sup>9</sup>, residues involved in dimer formation are marked with “\*”, and nucleotide interacting residues are marked with “+”. **b-c** Immunoblots of immunoprecipitates (top and middle) or lysates (bottom) of 293T cells. **d-e** Crystal structure of IRGA6 (PDB# 1TPZ) and GDP visualized with Mol\* to show the location of D126 (**d**), N87 and P-loop (**e**), Mg<sup>2+</sup> (green ball), and GDP (highlighted in dark color). Data are representative of two independent experiments (**b-c**).

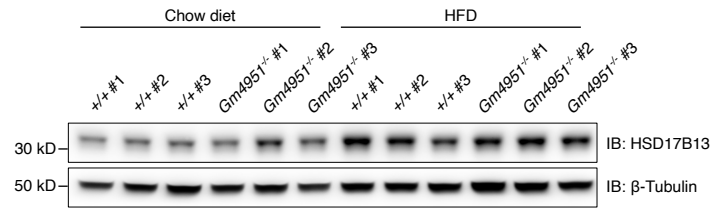

**Supplementary Fig. 6 No change in total protein level of HSD17B13 in *Gm4951<sup>-/-</sup>* liver.** Immunoblots of liver lysates from *+/+* and *Gm4951<sup>-/-</sup>* mice on chow diet or HFD for 4 weeks. Data are representative of two independent experiments.

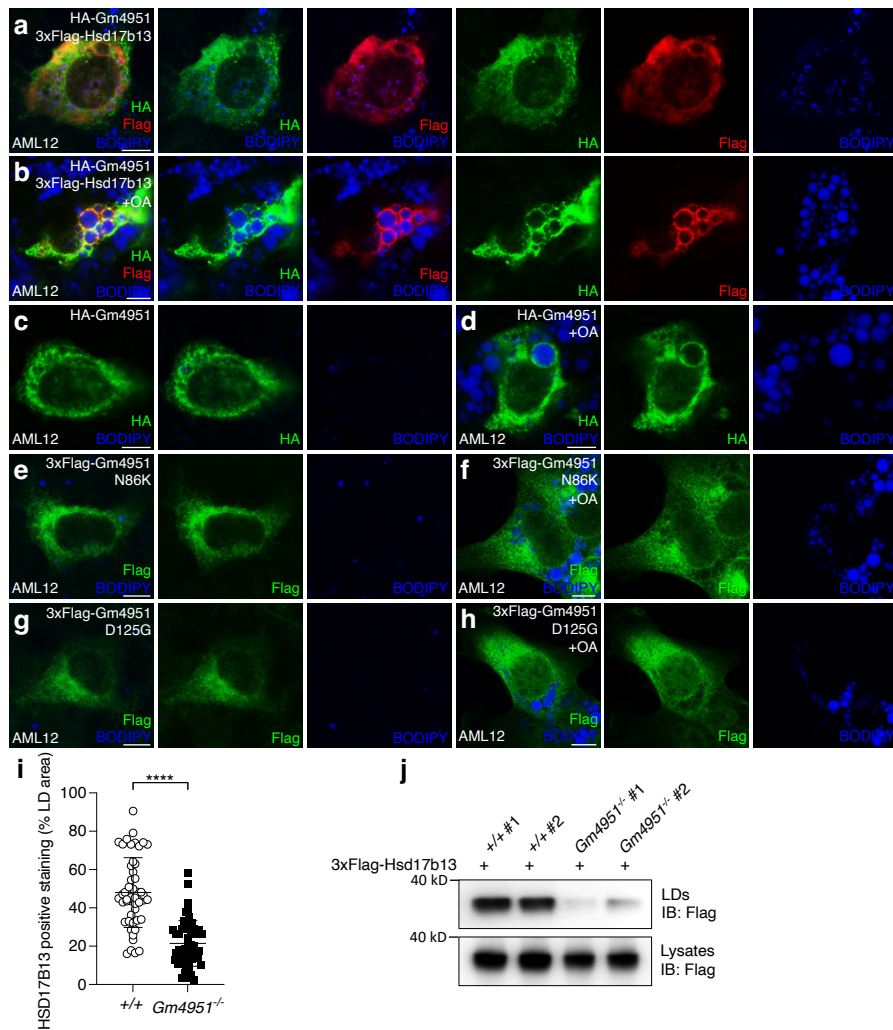

**Supplementary Fig. 7 GM4951 specifically regulates the LD translocation of HSD17B13. a-b** AML12 hepatocytes expressing HA-tagged Gm4951 and 3xFlag-tagged Hsd17b13 were immunostained with HA antibody (green), Flag antibody (red), and BODIPY (blue) to visualize LDs. 0.5 mM oleic acid for 24 h was used in +OA groups. **c-d** AML12 hepatocytes expressing HA-tagged Gm4951 without or with OA treatment were immunostained with HA antibody (green) and BODIPY (blue) to visualize LDs. **e-h** AML12 hepatocytes expressing 3xFlag-tagged Gm4951 mutants without (**e, g**) or with OA treatment (**f, h**) were immunostained with Flag antibody (green) and BODIPY (blue) to visualize LDs. **i** Quantification of the area with 3xFlag-HSD17B13 positive signal as a percentage of LD area in OA-treated primary hepatocytes of the indicated genotypes. LD area was defined by BODIPY positive signal. Each data point represents one LD (n=50 LDs in +/+; n=53 LDs in *Gm4951*<sup>-/-</sup>). Data are presented as means ± SD. *P* value was determined by two-tailed Student's *t* test. *P* values are denoted by \*\*\*\* *P* < 0.0001. The exact *P* value is 3.927x10<sup>-14</sup>. **j** Immunoblots of isolated LDs from 24h OA treated +/+ and *Gm4951*<sup>-/-</sup> primary hepatocytes expressing 3xFlag-HSD17B13. Hepatocytes were isolated from mice on chow diet. Data are representative of two independent experiments.



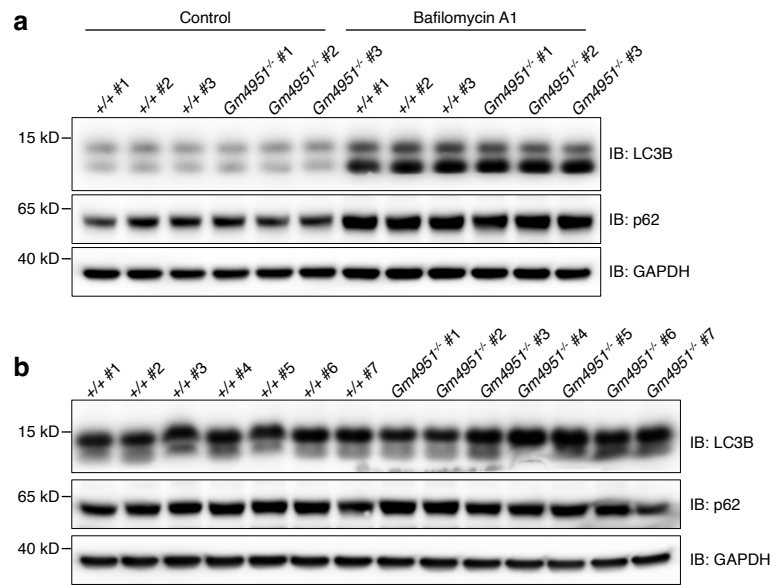

**Supplementary Fig. 8 Autophagic flux in *Gm4951*<sup>-/-</sup> primary hepatocytes and liver. a** Immunoblots of lysates of primary hepatocytes isolated from *+/+* and *Gm4951*<sup>-/-</sup> mice maintained on chow diet and treated *in vitro* with or without bafilomycin A1. **b** Immunoblots of liver lysates from *+/+* and *Gm4951*<sup>-/-</sup> mice. Data are representative of two independent experiments.

**Supplementary Table 1 Primers used for quantitative PCR.**

| <b>Target name</b>   | <b>Direction</b> | <b>Forward primer (5'-3')</b> | <b>Reverse primer (5'-3')</b> |
|----------------------|------------------|-------------------------------|-------------------------------|
| <i>Gm4951</i>        | Forward          | GTAGACTCAAGCCAAGAGCA          | AGCAGAAACTTTAAACAGTGGG        |
| <i>Polr2a</i>        | Forward          | CAAGATGCAAGAGGAGGAAGAG        | TGTTGTCTGTCTGAGGTAAGTG        |
| <i>Slc27a1</i>       | Forward          | CAGGCAAGGGCATGGATGAT          | ATGCGGTAGTACCTGCTGTG          |
| <i>Cd36</i>          | Forward          | ATTAATGGCACAGACGCAGC          | TTCAGATCCGAACACAGCGT          |
| <i>Acaca</i>         | Forward          | AGACTCACAACGAGATTTTAC         | CATTTCATAAGACCACCGAC          |
| <i>Fasn</i>          | Forward          | GATTCAGGGAGTGGATATTGTC        | GAATGTTACACCTTGCTCCT          |
| <i>Elovl6</i>        | Forward          | ACCGCAAGGCATTCAATTC           | AGTCGCTACGTGTTCTCTGC          |
| <i>Scd1</i>          | Forward          | GTTCCGCCACTCGCCTAC            | TGTAAGAACTGGAGATCTCTTGGA      |
| <i>Apob</i>          | Forward          | TACTTCCACCCACAGTCCCCT         | TGCTTTTTAGGGAGCCTAGCA         |
| <i>Mttp</i>          | Forward          | AGCCCCACTCAGGCAATTC           | GTTACATCCGGCCACTAGG           |
| <i>Ppara</i>         | Forward          | ATTTGCTGTGGAGATCGGC           | GCTTTGGGAAGAGGAAGGTGT         |
| <i>Acot1</i>         | Forward          | GGCTTGACATGCGGTG              | GAAAGGGTCCAGGTTCTGGG          |
| <i>Acox1</i>         | Forward          | TCCAATCATGCGATAGTCCTGG        | TCCCCAACAGTGATGCCTGG          |
| <i>Acadl</i>         | Forward          | TGCACACATACAGACGGTGC          | CATGGAAGCAGAACCGGAGT          |
| <i>3xFlag-Gm4951</i> | Forward          | TCTGCTATAACCTGCTGCGG          | CCCATCTTGTATCGTCATCCT         |
| <i>Pnpla2</i>        | Forward          | TCTACTAAAGACCCTGCCTG          | CAGACATTGGCCTGGATGAG          |
| <i>Dgat1</i>         | Forward          | GAGGACGAGGTGCGAGAC            | CAGACGATGGCACCTCAGAT          |
| <i>Lipe</i>          | Forward          | CTATTCAGGGACAGAGGCAG          | TAGTTCCAGGAAGGAGTTGAG         |
| <i>Fabp4</i>         | Forward          | ACACCGAGATTTCTTCAAACCTG       | CCATCTAGGGTTATGATGCTCTTC      |
| <i>Cebpa</i>         | Forward          | CTCTGATTCTTGCCAAACTGAG        | GACCCACTACTACATACACCC         |
| <i>Pparg</i>         | Forward          | CTGAGGAGAAGTCACACTCTG         | CGCTTCTTTCAAATCTTGTCTG        |
| <i>Adipoq</i>        | Forward          | GCACTGGCAAGTTCTACTGCAA        | GTAGGTGAAGAGAACGGCCTTGT       |
| <i>Leptin</i>        | Forward          | TCATCCAAAGTAGAACCCTGTC        | TGCTTTCCATCAAGTGTCCT          |
| <i>ACTB</i>          | Forward          | AAGATCAAGATCATTGCTCCTC        | ATACTCCTGCTTGCTGATCC          |
| <i>IRGC</i>          | Forward          | TTCTGGACAGCTGGAAGAAACA        | AGACTTAGTTTGTGGGTGAGGC        |
| <i>PPARA</i>         | Forward          | GGATGTCACACAACGCGATTC         | AGGCCTCGTAGATTCTCTTGG         |
| <i>ACOT1</i>         | Forward          | GCTCAGTCATCCTGAGGTAA          | GGAAAGAGGCCATGGAAAG           |
| <i>ACOX1</i>         | Forward          | CTCCGTGCAGCCAGATTAGT          | ATGTGCCTCACTTGCTCGAA          |
| <i>ACADL</i>         | Forward          | CCCCTGTGTTTCGGACATGG          | GAATGAGAACATCGCGCGGC          |
