# Supplementary material for: Loss of immunity-related GTPase GM4951 leads to nonalcoholic fatty liver disease without obesity
Source: PubMed Central journal article supplement (PMC9288484; doi:10.1038/s41467-022-31812-4), 2022-07-16
Supplement: 41467_2022_31812_MOESM3_ESM.pdf [file 41467_2022_31812_MOESM3_ESM.pdf]

Title: Supplementary Data 1.

Description: Proteins identified by mass spectrometric analysis of immunoprecipitates from WT and 3xFlag-Gm4951 mouse livers.
